# Supplementary material for: Astrocytes in Atp1a2‐deficient heterozygous mice exhibit hyperactivity after induction of cortical spreading depression
Source: PubMed Central journal article supplement (PMC7262908; doi:10.1002/2211-5463.12848), 2020-04-23

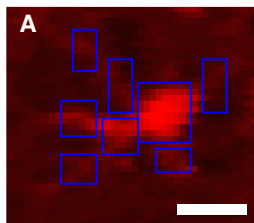

Correlation within a cell

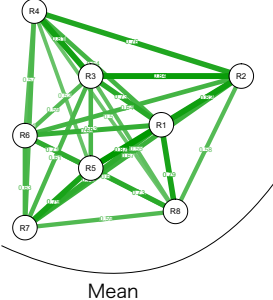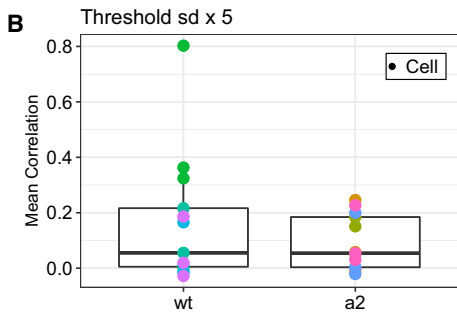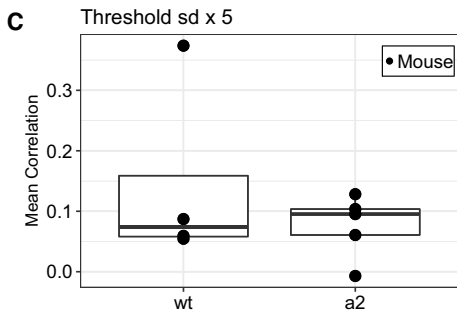

Supplement: FEB4-10-1031-s005.pdf [file FEB4-10-1031-s005.pdf]
